# Supplementary material for: Synthesis of optically active π-stacked compounds based on planar chiral tetrasubstituted [2.2]paracyclophane
Source: Royal Society of Chemistry journal article supplement (doi:10.1039/c7qm00613f), 2018-01-01
Supplement: c7qm00613f1.pdf [file c7qm00613f1.pdf]

***Supporting Information***

Synthesis of Optically Active  $\pi$ -Stacked Compounds Based on Planar Chiral Tetrasubstituted  
[2.2]Paracyclophane

Yusaku Sasai,<sup>1</sup> Hiromu Tsuchida,<sup>2</sup> Takahiro Kakuta,<sup>2</sup> Tomoki Ogoshi,<sup>2,3</sup> Yasuhiro Morisaki<sup>\*,1</sup>

<sup>1</sup> Department of Applied Chemistry for Environment, School of Science and Technology, Kwansai Gakuin University, 2-1 Gakuen, Sanda, Hyogo 669-1337, Japan.

<sup>2</sup> Graduate School of Natural Science and Technology, Kanazawa University, Kakuma-machi, Kanazawa, Ishikawa 920-1192, Japan.

<sup>3</sup> WPI Nano Life Science Institute, Kanazawa University, Kakuma-machi, Kanazawa, 920-1192, Japan.

E-mail: ymo@kwansai.ac.jp (Y.M.)

## General

$^1\text{H}$  and  $^{13}\text{C}$  spectra were recorded on a JEOL JNM ECX-500II instrument at 500 and 125 MHz, respectively. Samples were analyzed in  $\text{CD}_2\text{Cl}_2$  or  $\text{CDCl}_3$ , and the chemical shift values were expressed relative to  $\text{Me}_4\text{Si}$  as an internal standard. Analytical thin layer chromatography (TLC) was performed with silica gel 60 Merck F<sub>254</sub> plates. Column chromatography was performed with Wakogel C-300  $\text{SiO}_2$ . Flush column chromatography and recyclable preparative high-performance liquid chromatography (HPLC) were carried out on a YMC LC Forte/R. High-resolution mass (HRMS) spectra were obtained on a JEOL JMS-S3000 spectrometer for matrix assisted desorption/ionization (MALDI) with *trans*-2-[3-(4-*tert*-butylphenyl)-2-methyl-2-propenylidene]malononitrile (DCTB) as a matrix. UV-vis spectra were recorded on a JASCO V-730 spectrophotometer, and samples were analyzed in  $\text{CHCl}_3$  at room temperature. Photoluminescence (PL) spectra were recorded on a JASCO FP-8500 spectrofluorometer, and samples were analyzed in  $\text{CHCl}_3$  at room temperature. Absolute PL quantum efficiency was calculated on a JASCO FP8500 with a ILF-835 integrating sphere. Fluorescence decays in this study were measured by a picosecond time-correlated single-photon counting system with a response function of  $\sim 40$  ps. The samples were excited by a second harmonic ( $\sim 385$  nm) of a cavity-dumped Ti:sapphire laser (Cascade, KM Labs, 4 MHz,  $\sim 770$  nm). The fluorescence signal was collimated into a monochromator (JASCO, CT-10) and detected by a microchannel-plate photomultiplier (MCP) tube (Hamamatsu, R3809U). Fluorescence lifetimes were analyzed with a nonlinear least-squares iterative convolution method based on a Marquardt algorithm. Statistical fitting parameters used to evaluate the goodness of fit were reduced chi-squares ( $\chi^2$ ) and Durbin-Watson statistics (DW). Specific rotations ( $[\alpha]_D$ ) were measured with a HORIBA SEPA-500 polarimeter. Circular dichroism (CD) spectra were recorded on a JASCO J-1500 spectropolarimeter with  $\text{CHCl}_3$  as a solvent at room temperature; two scans were accumulated. Circularly polarized luminescence (CPL) spectra were recorded on a JASCO CPL-300 with  $\text{CHCl}_3$  as a solvent at room temperature. All samples for CPL were excited at 280 nm, and five scans were accumulated.

## Materials

### Commercially available compounds used without purification:

Trimethylsilylacetylene, *p*-methoxyphenylacetylene, phenylacetylene

Iodobenzene, *p*-iodoanisole

Pd<sub>2</sub>(dba)<sub>3</sub>, PdCl<sub>2</sub>(dppf)·CH<sub>2</sub>Cl<sub>2</sub> (dppf = 1,1'-bis(diphenylphosphino)ferrocene)

(*t*-Bu)<sub>3</sub>P·HBF<sub>4</sub>, dppf

CuI, K<sub>2</sub>CO<sub>3</sub>

THF (dehydrated), MeOH

Et<sub>3</sub>N was purchased and purified by distillation using KOH.

### Compounds prepared as described in the literature:

(*R*<sub>p</sub>)- and (*S*<sub>p</sub>)-**2** and (*R*<sub>p</sub>)- and (*S*<sub>p</sub>)-**3**

Morisaki, Y.; Gon, M.; Sasamori, T.; Tokitoh, N.; Chujo Y. *J. Am. Chem. Soc.* **2014**, *136*(9), 3350-3353.

## Synthesis of (*R<sub>p</sub>*)-4

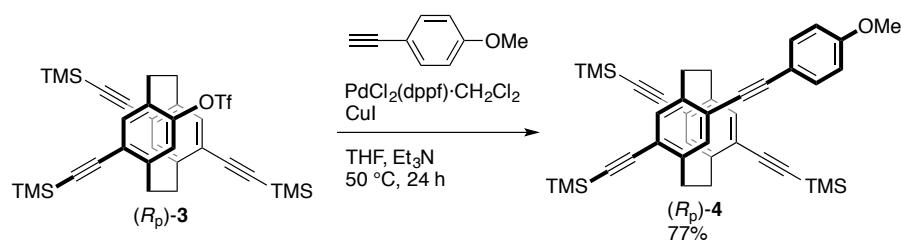

A mixture of (*R<sub>p</sub>*)-3 (1.10 g, 1.70 mmol),  $\text{PdCl}_2(\text{dppf})\cdot\text{CH}_2\text{Cl}_2$  (254 mg, 0.31 mmol),  $\text{CuI}$  (53 mg, 0.28 mmol), THF (20 mL) and  $\text{Et}_3\text{N}$  (20 mL) was placed in a round-bottom flask equipped with a magnetic stirring bar. After degassing the reaction mixture several times, *p*-methoxyphenylacetylene (1.53 mg, 11.6 mmol) was added to the mixture. The reaction was carried out at  $50\text{ }^\circ\text{C}$  for 24 h with stirring. After the reaction mixture was cooled to room temperature, precipitates were removed by filtration, and the solvent was removed with a rotary evaporator. The residue was purified by column chromatography on  $\text{SiO}_2$  ( $\text{CHCl}_3/\text{hexane} = 1/4$  v/v as an eluent) to afford (*R<sub>p</sub>*)-4 (822 mg, 1.31 mmol, 77%) as a light yellow solid.

$R_f = 0.25$  ( $\text{CHCl}_3/\text{hexane} = 1/4$  v/v).  $^1\text{H NMR}$  ( $\text{CDCl}_3$ , 500 MHz)  $\delta$  0.32 (three singlet peaks, 27H), 2.95 (m, 4H), 3.42 (m, 4H), 3.83 (s, 3H), 6.91 (d,  $J = 8.5$  Hz, 2H), 7.01 (two singlet peaks, 2H), 7.02 (s, 1H), 7.04 (s, 1H), 7.50 (d,  $J = 8.5$  Hz, 2H) ppm;  $^{13}\text{C NMR}$  ( $\text{CDCl}_3$ , 125 MHz)  $\delta$  32.3 (two peaks), 32.4, 32.6, 55.5, 87.9, 94.7, 99.3, 99.5, 99.6, 104.9, 105.14, 105.18, 114.3, 115.9, 124.7, 125.3 (two peaks), 125.8, 133.1, 134.1, 134.6 (two peaks), 134.7, 141.5, 142.3, 142.4, 142.8, 159.9 ppm. HRMS (MALDI) calcd. for  $\text{C}_{40}\text{H}_{46}\text{OSi}_3 \text{M}^+$ : 626.2851, found 626.2841.  $[\alpha]_D^{25} = +44.8$  ( $c = 0.5$ ,  $\text{CHCl}_3$ ).

(*S<sub>p</sub>*)-4 was obtained in 69% yield by the same procedure of (*R<sub>p</sub>*)-5. HRMS (MALDI) calcd. for  $\text{C}_{40}\text{H}_{46}\text{OSi}_3 \text{M}^+$ : 626.2851, found 626.2839.  $[\alpha]_D^{25} = -44.2$  ( $c = 0.5$ ,  $\text{CHCl}_3$ ).

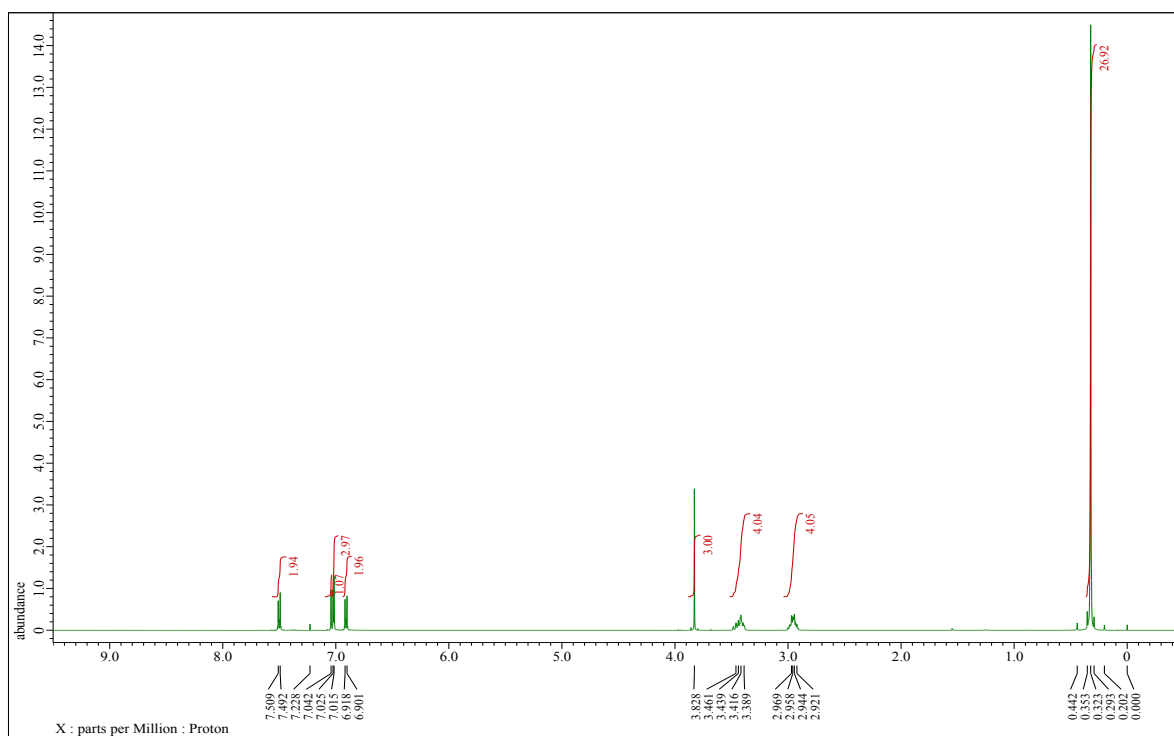

<sup>1</sup>H NMR spectrum of (*R<sub>p</sub>*)-4.

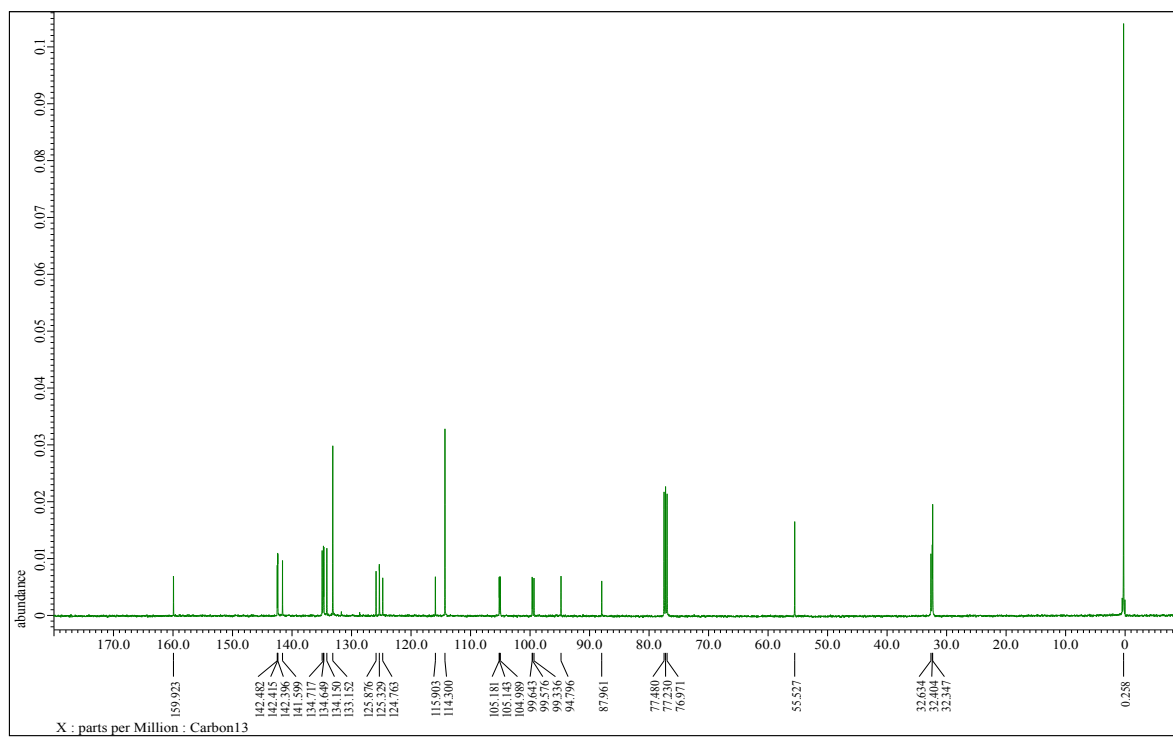

<sup>13</sup>C NMR spectrum of (*R<sub>p</sub>*)-4.

## Synthesis of (*R<sub>p</sub>*)-**5**

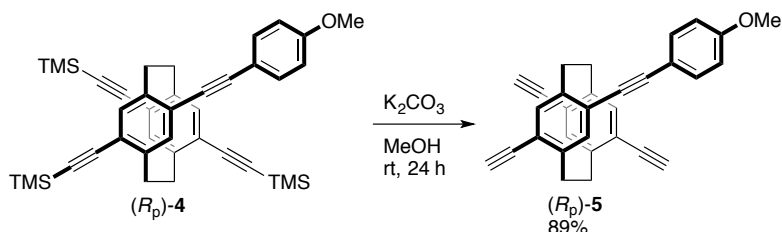

$\text{K}_2\text{CO}_3$  (1.03 g, 7.48 mmol) was added to a suspension of (*R<sub>p</sub>*)-**4** (822 mg, 1.31 mmol) in MeOH (40 mL). After the mixture was stirred for 24 h at room temperature,  $\text{H}_2\text{O}$  and  $\text{CHCl}_3$  were added to the reaction mixture. The organic layer was extracted with  $\text{CHCl}_3$  and washed with brine. The combined organic layer was dried over  $\text{MgSO}_4$ .  $\text{MgSO}_4$  was removed by filtration, and the solvent was removed with a rotary evaporator. The residue was purified by column chromatography on  $\text{SiO}_2$  ( $\text{CHCl}_3/\text{hexane} = 1/2$  v/v as an eluent) to afford (*R<sub>p</sub>*)-**5** (480 mg, 1.17 mmol, 89%) as a pale yellow solid.

$R_f = 0.35$  ( $\text{CHCl}_3/\text{hexane} = 1/2$  v/v).  $^1\text{H NMR}$  ( $\text{CDCl}_3$ , 500 MHz)  $\delta$  3.0 (m, 4H), 3.36 (s, 1H), 3.372 (s, 1H), 3.378 (s, 1H), 1.94 (d,  $J = 8.5$  Hz, 2H), 7.03 (s, 1H), 7.04 (s, 1H), 7.06 (s, 1H), 7.08 (s, 1H), 7.51 (d,  $J = 8.5$  Hz, 2H) ppm;  $^{13}\text{C NMR}$  ( $\text{CDCl}_3$ , 125 MHz)  $\delta$  32.2 (two peaks), 32.45, 32.49, 81.8, 82.1, 82.2, 83.01, 83.06, 83.2, 87.6, 95.0, 114.3, 115.7, 123.6, 124.5, 124.6, 126.3, 133.2, 134.4, 135.1, 141.8, 142.7, 160.0 ppm. HRMS (MALDI) calcd. for  $\text{C}_{31}\text{H}_{22}\text{O M}^+$ : 410.1671, found 410.1697.  $[\alpha]_D^{25} = -69.2$  ( $c = 0.5$ ,  $\text{CHCl}_3$ ).

(*S<sub>p</sub>*)-**5** was obtained in 71% yield by the same procedure of (*R<sub>p</sub>*)-**5**. HRMS (MALDI) calcd. for  $\text{C}_{31}\text{H}_{22}\text{O M}^+$ : 410.1671, found 410.1692.  $[\alpha]_D^{25} = +68.8$  ( $c = 0.5$ ,  $\text{CHCl}_3$ ).

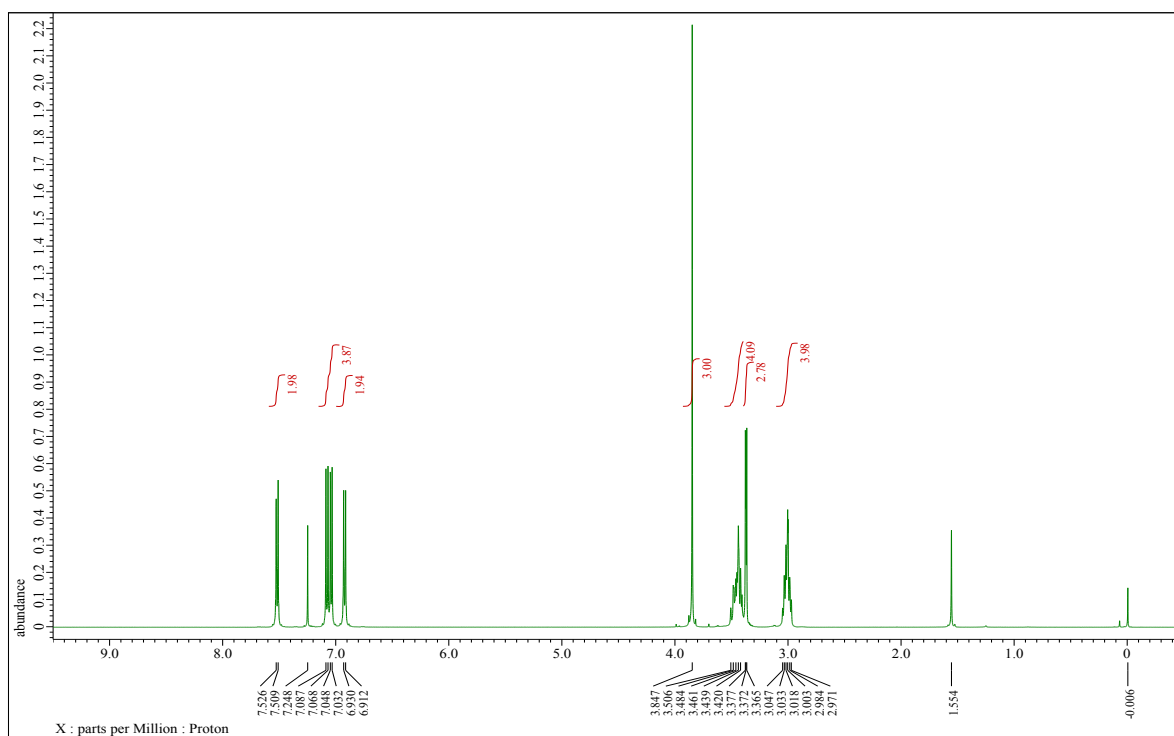

<sup>1</sup>H NMR spectrum of (*R<sub>p</sub>*)-**5**.

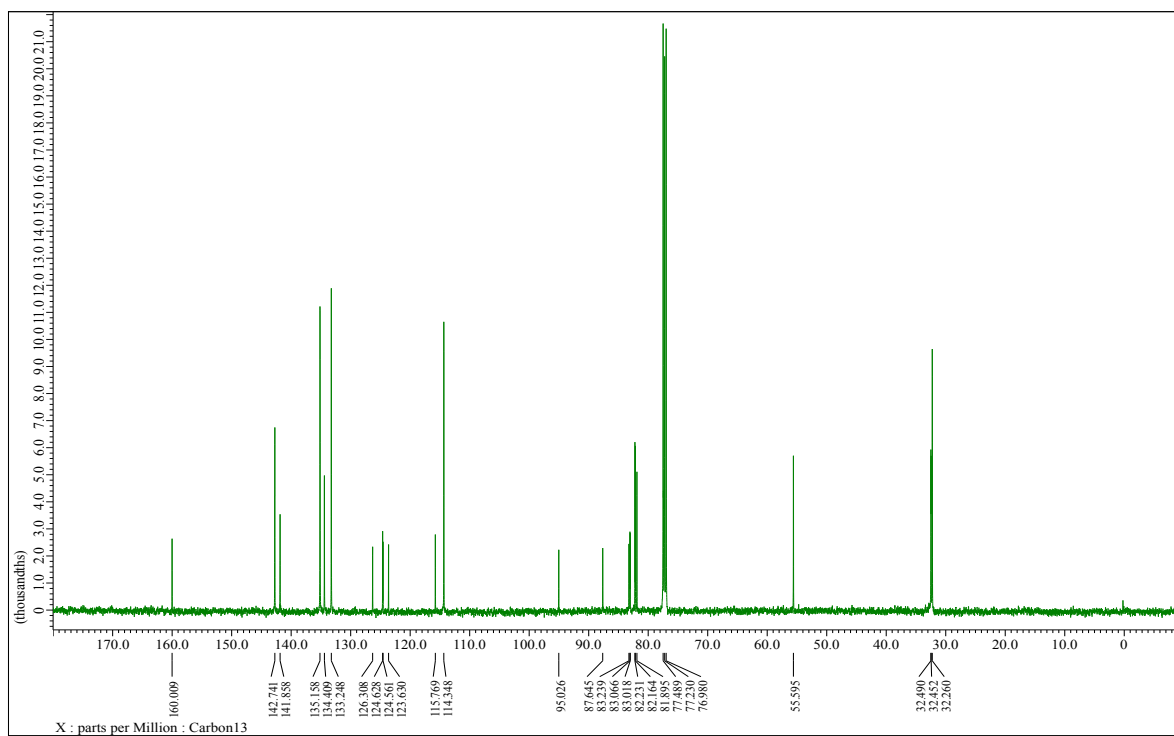

<sup>13</sup>C NMR spectrum of (*R<sub>p</sub>*)-**5**.

## Synthesis of (*R<sub>p</sub>*)-**6**

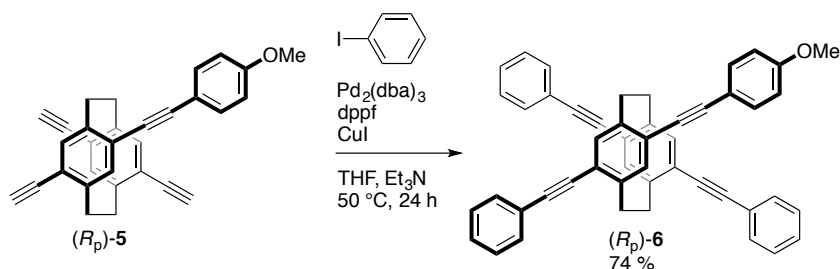

A mixture of (*R<sub>p</sub>*)-**5** (20.1 mg, 0.05 mmol), Pd<sub>2</sub>(dba)<sub>3</sub> (5.9 mg, 0.006 mmol), dppf (8.0 mg, 0.012 mmol), CuI (4.0 mg, 0.021 mmol), THF (3.0 mL) and Et<sub>3</sub>N (3.0 mL) was placed in a round-bottom flask equipped with a magnetic stirring bar. After degassing the reaction mixture several times, iodobenzene (91.5 mg, 0.45 mmol) was added, and the reaction was carried out at 50 °C for 24 h with stirring. After the reaction mixture was cooled to room temperature, precipitates were removed by filtration, and the solvent was removed with a rotary evaporator. The residue was purified by column chromatography on SiO<sub>2</sub> (CHCl<sub>3</sub>/hexane = 1/1 v/v as an eluent) to afford (*R<sub>p</sub>*)-**6** (23.1 mg, 0.036 mmol, 74%) as a light yellow solid.

$R_f = 0.32$  (CHCl<sub>3</sub>/hexane = 3/7 v/v). <sup>1</sup>H NMR (CDCl<sub>3</sub>, 500 MHz)  $\delta$  3.09 (m, 4H), 3.55 (m, 4H), 3.85 (s, 3H), 6.92 (d,  $J = 8.5$  Hz, 2H), 7.12 (s, 1H), 7.14 (s, 1H), 7.15 (s, 1H), 7.16 (s, 1H), 7.39 m, 9H), 7.52 (d,  $J = 8.5$  Hz, 2H), 7.59 (m, 6 H) ppm; <sup>13</sup>C NMR (CDCl<sub>3</sub>, 125 MHz)  $\delta$  32.8 (four peaks), 55.5, 88.1, 89.4 (two peaks), 89.5, 94.5, 94.70, 94.72, 94.8, 114.3, 115.9, 123.80, 123.82, 124.87, 125.24, 125.27, 125.6, 128.5, 128.6, 131.7, 133.2, 134.6, 134.81, 134.85, 141.8, 142.05, 142.08, 142.1, 159.9 ppm. HRMS (MALDI) calcd. for C<sub>49</sub>H<sub>34</sub>O M<sup>+</sup>: 638.2610, found 638.2620.  $[\alpha]_D^{25} = +84.7$  ( $c = 0.25$ , CHCl<sub>3</sub>).

(*S<sub>p</sub>*)-**6** was obtained in 81% yield by the same procedure of (*R<sub>p</sub>*)-**6**. HRMS (MALDI) calcd. for C<sub>49</sub>H<sub>34</sub>O M<sup>+</sup>: 638.2610, found 638.2621.  $[\alpha]_D^{25} = -85.3$  ( $c = 0.25$ , CHCl<sub>3</sub>).



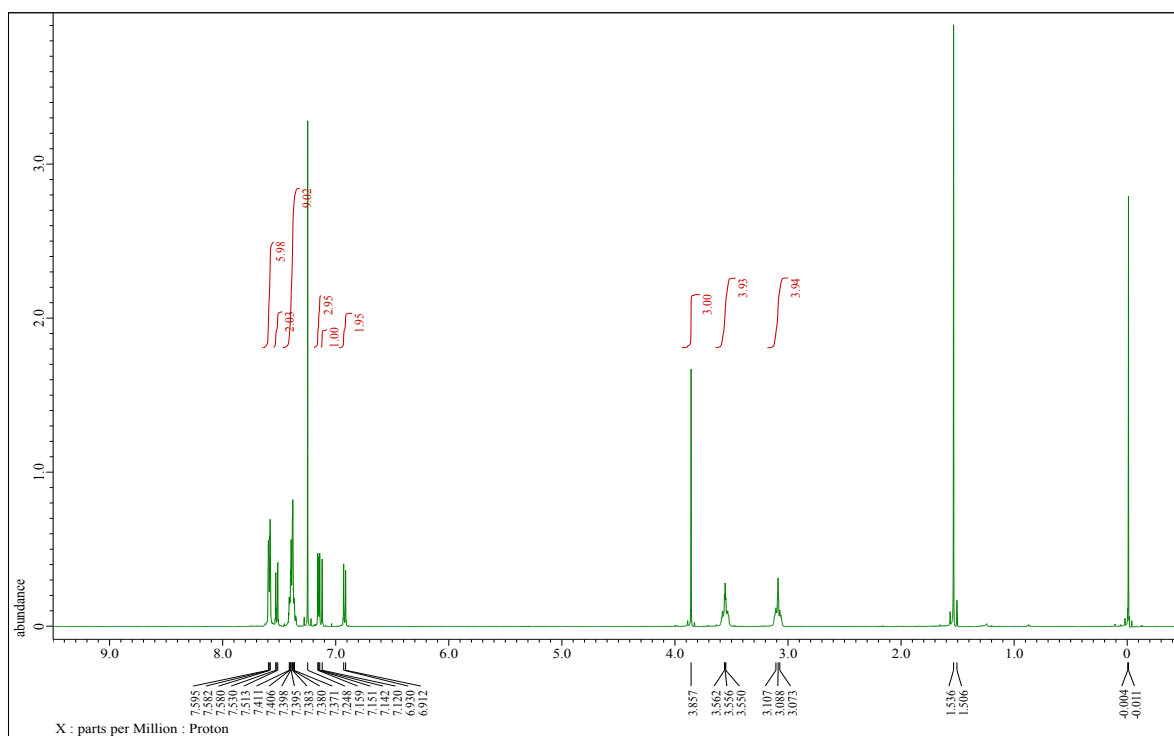

<sup>1</sup>H NMR spectrum of (R<sub>p</sub>)-6.

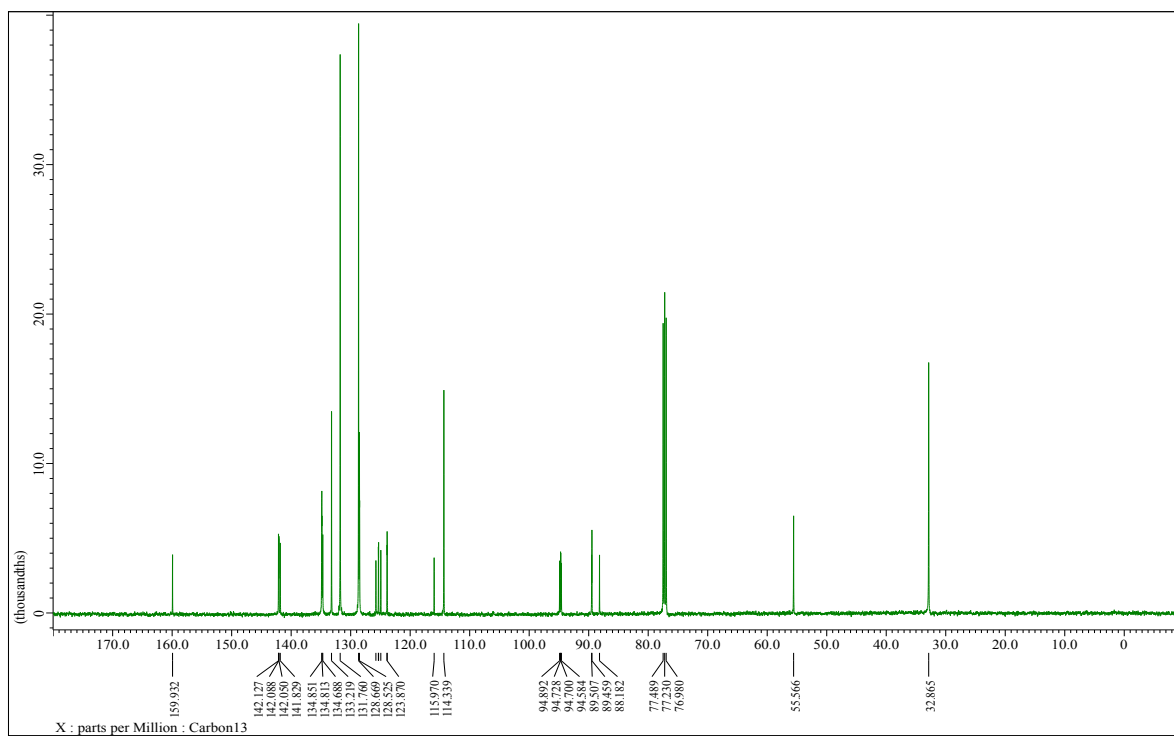

<sup>13</sup>C NMR spectrum of (R<sub>p</sub>)-6.

## Synthesis of (*R<sub>p</sub>*)-7

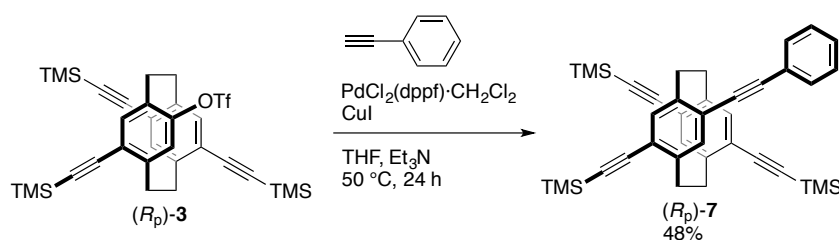

A mixture of (*R<sub>p</sub>*)-3 (566.3 mg, 0.88 mmol), PdCl<sub>2</sub>(dppf)·CH<sub>2</sub>Cl<sub>2</sub> (140.0 mg, 0.17 mmol), CuI (40 mg, 0.21 mmol), THF (7.5 mL) and Et<sub>3</sub>N (7.5 mL) was placed in a round-bottom flask equipped with a magnetic stirring bar. After degassing the reaction mixture several times, phenylacetylene (484 mg, 4.7 mmol) was added to the mixture. The reaction was carried out at 50 °C for 24 h with stirring. After the reaction mixture was cooled to room temperature, precipitates were removed by filtration, and the solvent was removed with a rotary evaporator. The residue was purified by column chromatography on SiO<sub>2</sub> (CHCl<sub>3</sub>/hexane = 1/9 v/v as an eluent) to afford (*R<sub>p</sub>*)-7 (250.6 mg, 0.42 mmol, 48%) as a light yellow solid.

$R_f = 0.51$  (CHCl<sub>3</sub>/hexane = 1/9 v/v). <sup>1</sup>H NMR (CDCl<sub>3</sub>, 500 MHz)  $\delta$  0.33 (three singlet peaks, 27H), 2.96 (m, 4H), 3.42 (m, 4H), 7.01 (s, 1H), 7.02 (s, 1H), 7.03 (s, 1H), 7.08 (s, 1H), 7.38 (m, 3 H), 7.57 (d,  $J = 7.5$  Hz, 2H) ppm; <sup>13</sup>C NMR (CDCl<sub>3</sub>, 125 MHz)  $\delta$  32.3 (two peaks), 32.4, 32.6, 89.1, 94.6, 99.6 (two peaks), 99.7, 104.9, 105.0, 105.1, 123.6, 125.1, 125.31, 125.36, 125.4, 128.5, 128.6, 131.6, 134.3, 134.6, 134.7, 135.0, 141.9, 142.4 (two peaks), 142.5 ppm. HRMS (MALDI) calcd. for C<sub>39</sub>H<sub>44</sub>Si<sub>3</sub> M<sup>+</sup>: 596.2751, found 596.2744.  $[\alpha]_D^{25} = +58.9$  ( $c = 0.5$ , CHCl<sub>3</sub>).

(*S<sub>p</sub>*)-7 was obtained in 66% yield by the same procedure of (*R<sub>p</sub>*)-7. HRMS (MALDI) calcd. for C<sub>39</sub>H<sub>44</sub>Si<sub>3</sub> M<sup>+</sup>: 626.2856, found 596.2769.  $[\alpha]_D^{25} = -58.7$  ( $c = 0.5$ , CHCl<sub>3</sub>).

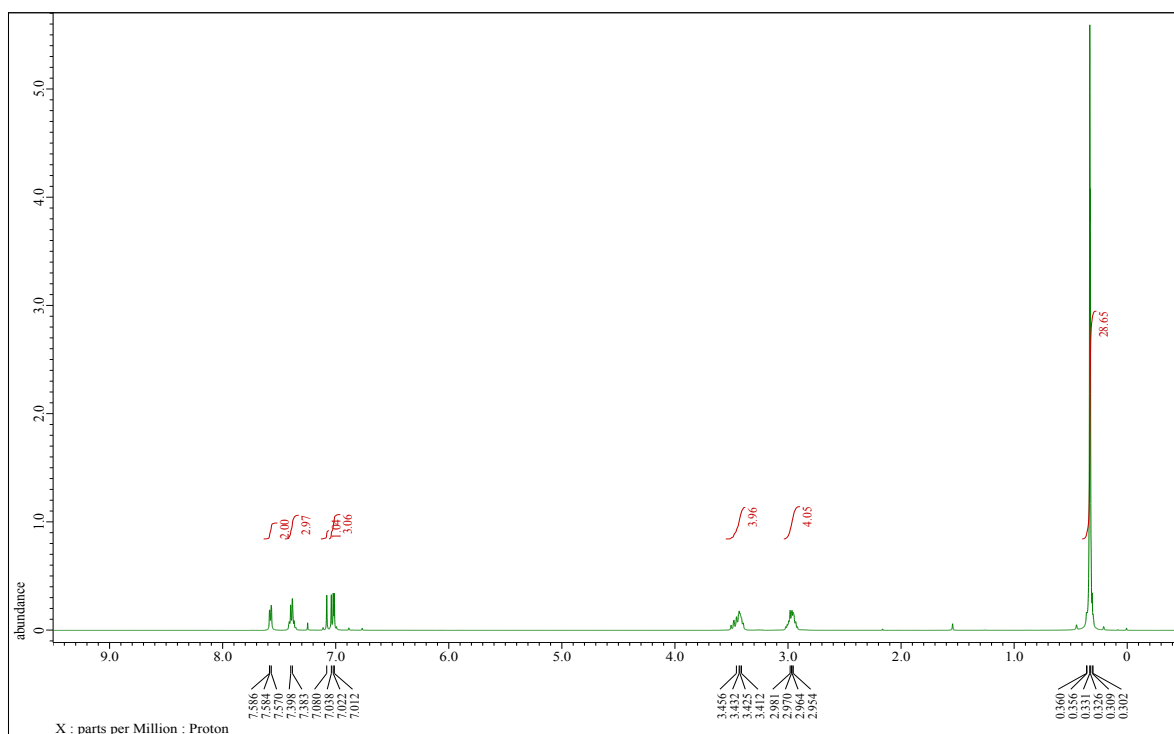

<sup>1</sup>H NMR spectrum of (*R<sub>p</sub>*)-7.

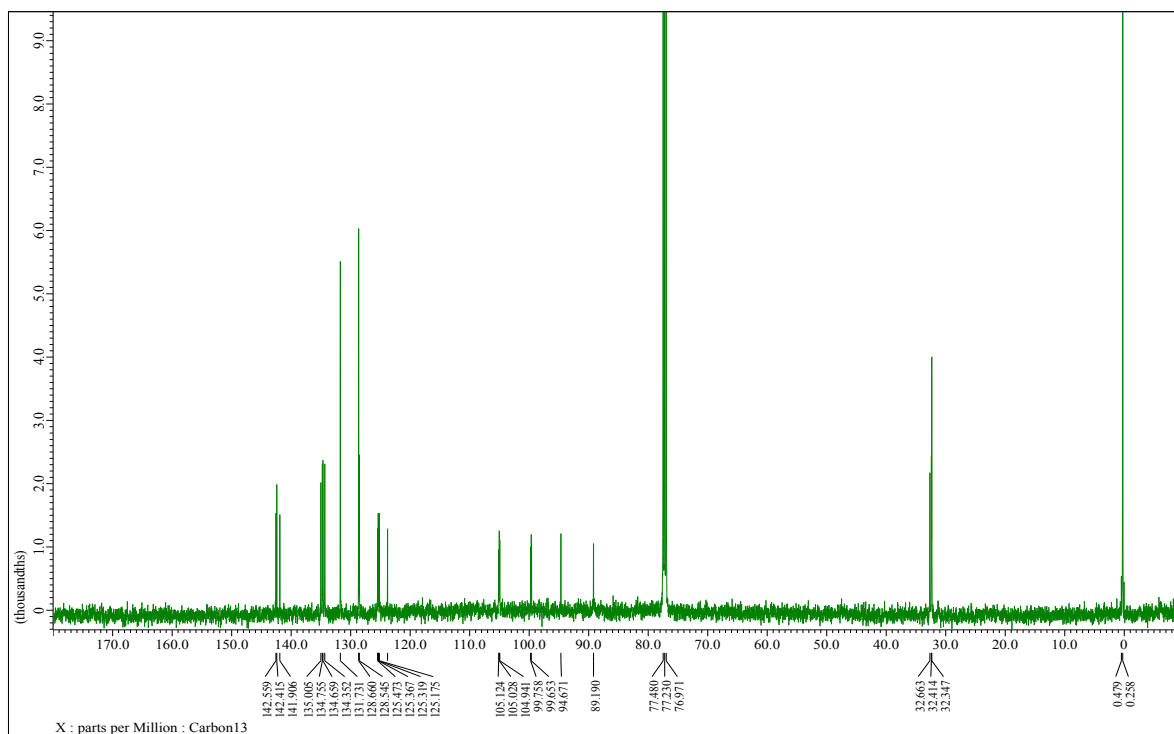

<sup>13</sup>C NMR spectrum of (*R<sub>p</sub>*)-7.

## Synthesis of (*R*<sub>p</sub>)-**8**

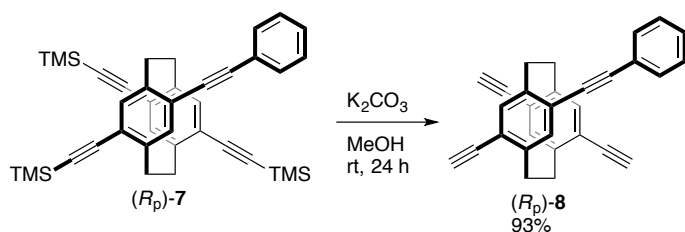

$K_2CO_3$  (281.2 mg, 2.03 mmol) was added to a suspension of (*R*<sub>p</sub>)-**7** (187.3 mg, 0.31 mmol) in MeOH (10 mL). After the mixture was stirred for 24 h at room temperature,  $H_2O$  and  $CHCl_3$  were added to the reaction mixture. The organic layer was extracted with  $CHCl_3$  and washed with brine. The combined organic layer was dried over  $MgSO_4$ .  $MgSO_4$  was removed by filtration, and the solvent was removed with a rotary evaporator. The residue was purified by column chromatography on  $SiO_2$  ( $CHCl_3$ /hexane = 1/4 v/v as an eluent) to afford (*R*<sub>p</sub>)-**8** (111.0 mg, 0.29 mmol, 93%) as a pale yellow solid.

$R_f = 0.38$  ( $CHCl_3$ /hexane = 1/4 v/v).  $^1H$  NMR ( $CDCl_3$ , 500 MHz)  $\delta$  3.02 (m, 4H), 3.38 (three singlet peaks, 3H), 3.48 (m, 4H), 7.07 (m, 4H), 7.40 (m, 3H), 7.59 (d,  $J = 8.0$  Hz, 2H) ppm;  $^{13}C$  NMR ( $CDCl_3$ , 125 MHz)  $\delta$  32.3-32.5 (four peaks), 82.0, 82.23, 82.27, 82.9, 83.0, 83.1, 88.8, 94.8, 123.6, 124.0, 124.6, 125.9, 128.6, 131.7, 134.4, 134.6, 135.0, 135.1, 135.2, 135.3, 142.1, 142.72, 142.75, 142.8 ppm. HRMS (MALDI) calcd. for  $C_{30}H_{20} M^+$ : 380.1565, found 380.1553.  $[\alpha]_D^{25} = -76.0$  ( $c = 0.25$ ,  $CHCl_3$ ).

(*S*<sub>p</sub>)-**8** was obtained in 75% yield by the same procedure of (*R*<sub>p</sub>)-**8**. HRMS (MALDI) calcd. for  $C_{31}H_{22}O M^+$ : 380.1565, found 380.1546.  $[\alpha]_D^{25} = +76.0$  ( $c = 0.25$ ,  $CHCl_3$ ).

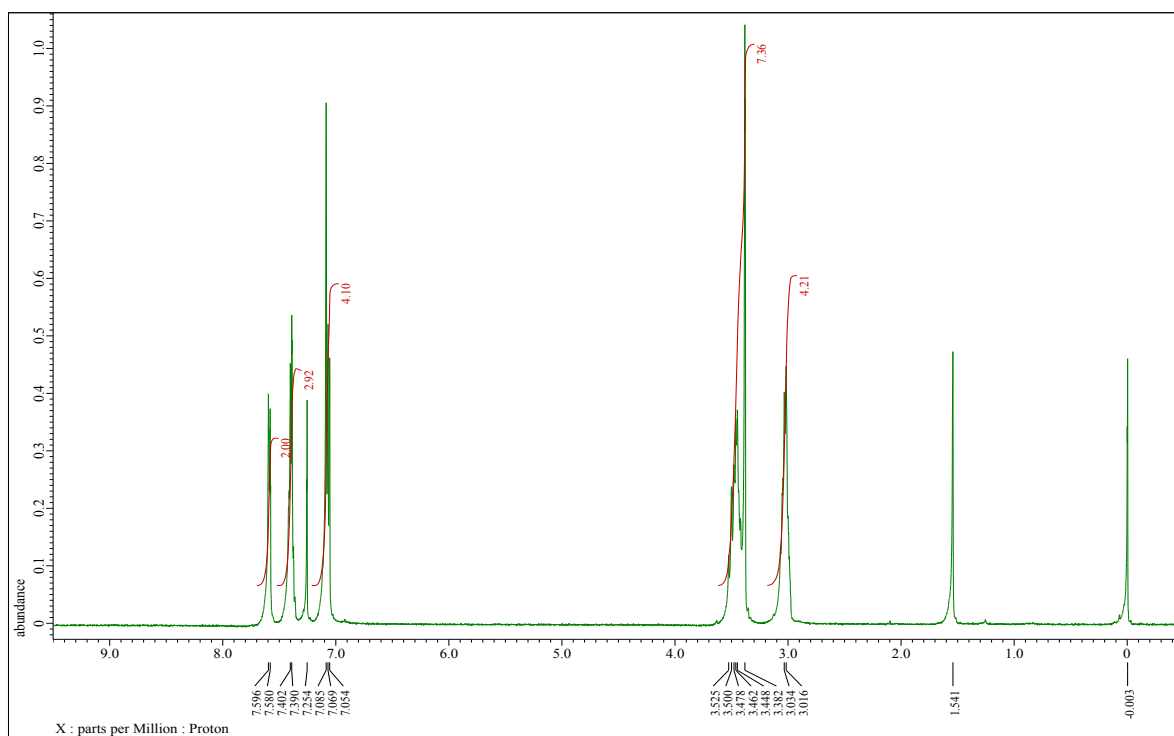

<sup>1</sup>H NMR spectrum of (Rp)-8.

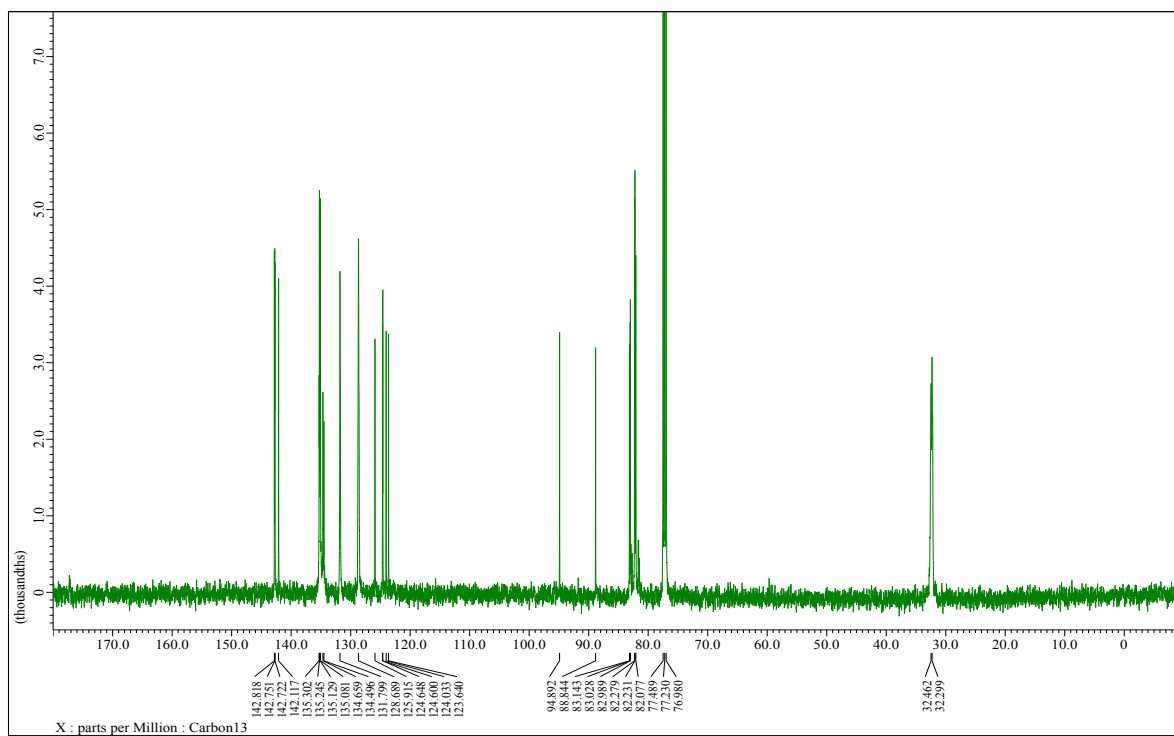

<sup>13</sup>C NMR spectrum of (Rp)-8.

## Synthesis of (*R<sub>p</sub>*)-**9**

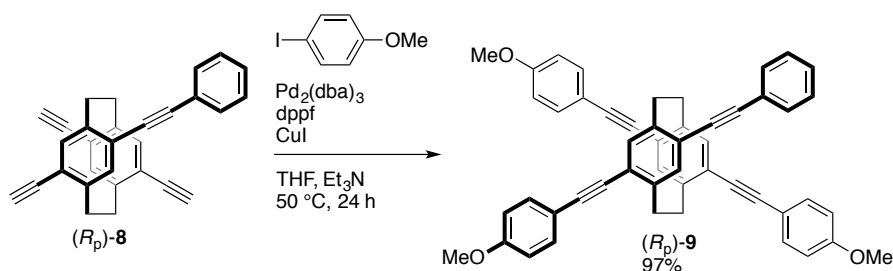

A mixture of (*R<sub>p</sub>*)-**8** (111.0 mg, 0.29 mmol), *p*-iodoanisole (212.3 mg, 0.91 mmol),  $\text{Pd}_2(\text{dba})_3$  (27.5 mg, 0.03 mmol), dppf (35.1 mg, 0.06 mmol), CuI (20.0 mg, 0.11 mmol), THF (10 mL) and  $\text{Et}_3\text{N}$  (10 mL) was placed in a round-bottom flask equipped with a magnetic stirring bar. After degassing the reaction mixture several times, the reaction was carried out at 50 °C for 24 h with stirring. After the reaction mixture was cooled to room temperature, precipitates were removed by filtration, and the solvent was removed with a rotary evaporator. The residue was purified by column chromatography on  $\text{SiO}_2$  ( $\text{CHCl}_3/\text{hexane} = 4/1$  v/v as an eluent) to afford (*R<sub>p</sub>*)-**9** (197.6 mg, 0.28 mmol, 97%) as a light yellow solid.

$R_f = 0.45$  ( $\text{CHCl}_3/\text{hexane} = 1/1$  v/v).  $^1\text{H NMR}$  ( $\text{CDCl}_3$ , 500 MHz)  $\delta$  3.07 (m, 4H), 3.54 (m, 4H), 3.86 (three singlet peaks, 3H), 6.92 (m, 6H), 7.11 (s, 1H), 7.12 (s, 1H), 7.13 (s, 1H), 7.15 (s, 1H), 7.39 (m, 3H), 7.53 (m, 5H), 7.58 (d,  $J = 8.0$  Hz, 2H) ppm;  $^{13}\text{C NMR}$  ( $\text{CDCl}_3$ , 125 MHz)  $\delta$  32.8 (four peaks), 55.5 (three peaks), 88.2 (three peaks), 89.5, 94.4, 94.6 (two peaks), 94.7, 114.3, 116.0, 123.9, 124.8, 125.3, 125.7, 128.4, 128.6, 131.7, 133.1, 134.6, 134.7, 141.7, 141.8, 142.0, 159.8 ppm. HRMS (MALDI) calcd. for  $\text{C}_{51}\text{H}_{38}\text{O}_3$   $\text{M}^+$ : 698.2821, found 698.2919.  $[\alpha]_D^{25} = +77.0$  ( $c = 0.25$ ,  $\text{CHCl}_3$ ).

(*S<sub>p</sub>*)-**9** was obtained in 95% yield by the same procedure of (*R<sub>p</sub>*)-**9**. HRMS (MALDI) calcd. for  $\text{C}_{40}\text{H}_{46}\text{OSi}_3$   $\text{M}^+$ : 698.2821, found 698.2824.  $[\alpha]_D^{25} = -77.2$  ( $c = 0.25$ ,  $\text{CHCl}_3$ ).

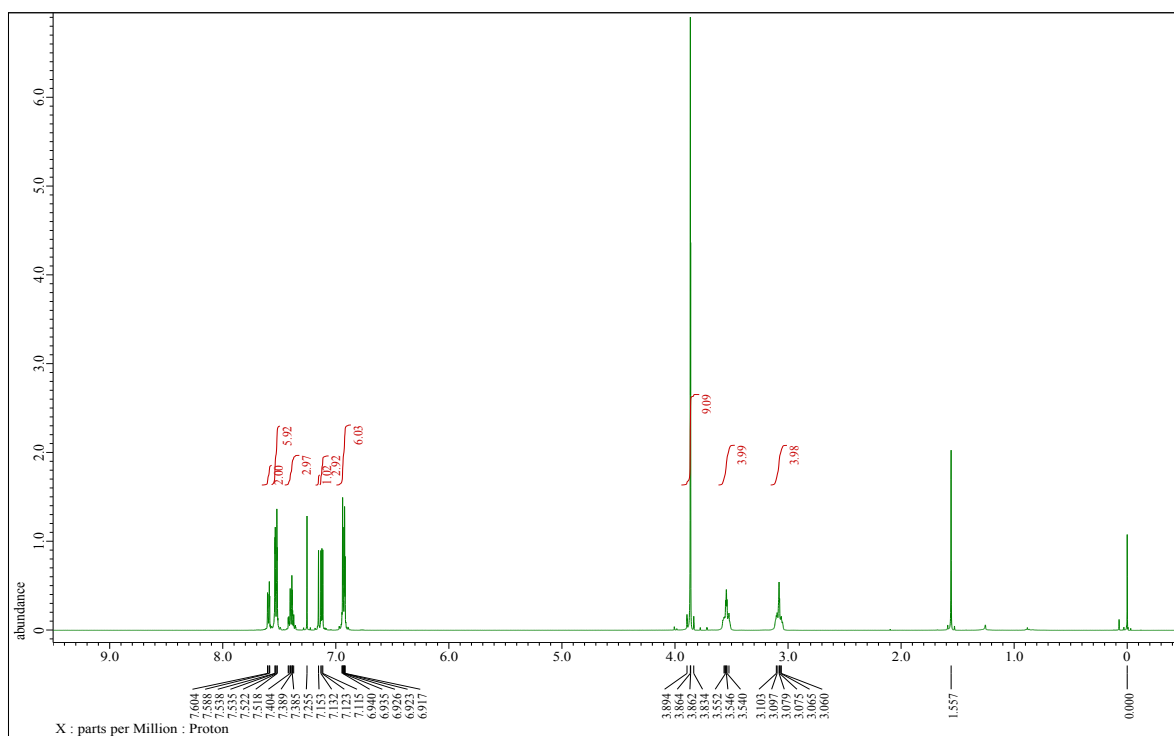

$^1\text{H}$  NMR spectrum of ( $R_p$ )-**9**.

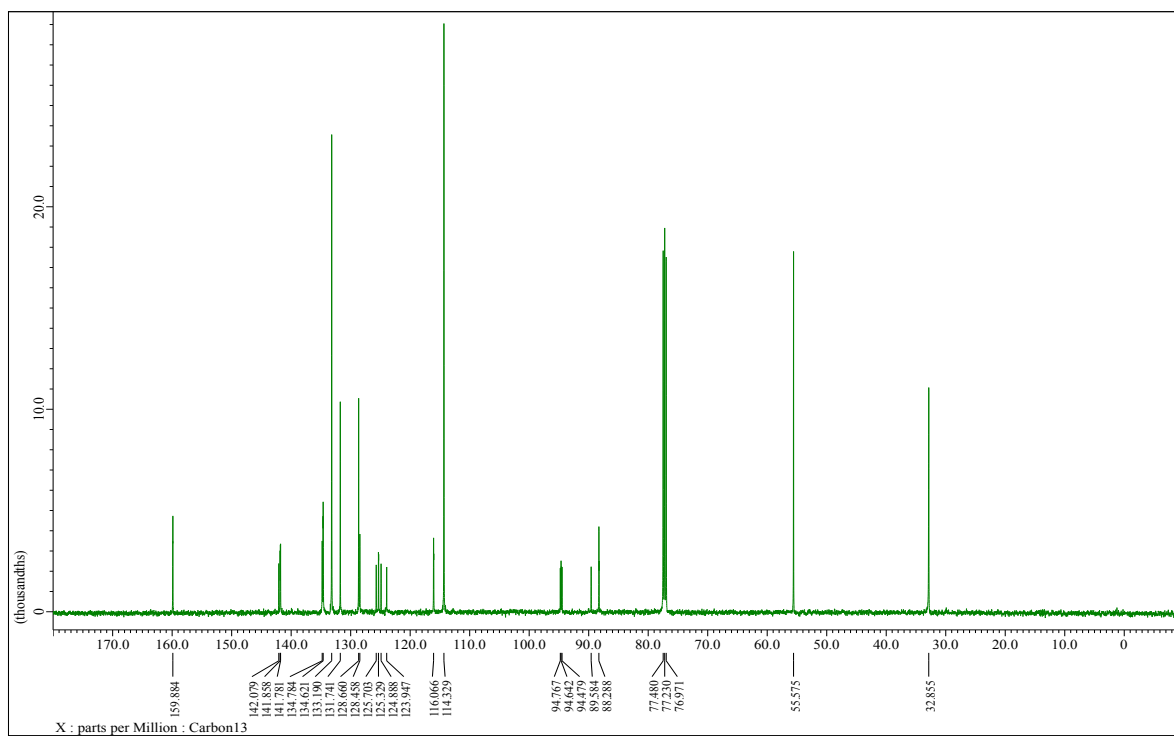

$^{13}\text{C}$  NMR spectrum of ( $R_p$ )-**9**.

**Table S1.** Optical properties of X-shaped compounds

|                                                                                                                   | UV-vis <sup>[a]</sup><br>$\lambda_{\max}$ /nm ( $\epsilon/10^5$ cm <sup>-1</sup> M <sup>-1</sup> ) | PL <sup>[b]</sup><br>$\lambda_{\max}$ /nm | $\tau$ <sup>[c]</sup> /ns | $\Phi_{\text{lum}}$ <sup>[d]</sup> | CPL <sup>[e]</sup><br>$ g_{\text{lum}} /10^{-3}$ |
|-------------------------------------------------------------------------------------------------------------------|----------------------------------------------------------------------------------------------------|-------------------------------------------|---------------------------|------------------------------------|--------------------------------------------------|
| [f]<br>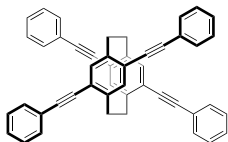                          | 349 (0.63)                                                                                         | 412                                       | 3.67                      | 0.60                               | 1.1                                              |
| This work: compound <b>6</b><br> | 352 (0.60)                                                                                         | 420                                       | 3.57                      | 0.71                               | 1.5                                              |
| This work: compound <b>9</b><br> | 357 (0.56)                                                                                         | 424                                       | 3.00                      | 0.73                               | 1.7                                              |
| [g]<br>                        | 361 (0.68)                                                                                         | 427                                       | 2.21                      | 0.75                               | 1.7                                              |

[a] In CHCl<sub>3</sub> (1.0 × 10<sup>-5</sup> M).

[b] In CHCl<sub>3</sub> (1.0 × 10<sup>-5</sup> M), excited around absorption maxima.

[c] Emission lifetime around PL  $\lambda_{\max}$ . All PL decay curves could be fitted to a single-exponential equation.

[d] Absolute PL quantum efficiency.

[e] Absolute  $g_{\text{lum}}$  value between enantiomers.  $g_{\text{lum}} = 2(I_{\text{left}} - I_{\text{right}})/(I_{\text{left}} + I_{\text{right}})$ , where  $I_{\text{left}}$  and  $I_{\text{right}}$  indicate luminescence intensities of left- and right-handed CPL, respectively.

[f] Gon, M.; Morisaki, Y.; Chujo Y. *Eur. J. Org. Chem.* **2015**, (35), 7756-7762.

[g] Gon, M.; Morisaki, Y.; Sawada, R.; Chujo Y. *Chem.–Eur. J.* **2016**, 22(7), 2291-2298. The enantiomers were prepared, and data were collected again for this work.
